# Supplementary material for: High-Throughput Flow Injection Analysis–Mass Spectrometry (FIA-MS) Fingerprinting for the Authentication of Tea Application to the Detection of Teas Adulterated with Chicory
Source: MDPI journal article supplement (doi:10.3390/foods11142153), 2022-07-20
Supplement: s1 [file s1]

# High-Throughput Flow Injection Analysis-Mass Spectrometry (FIA-MS) Fingerprinting for the Authentication of Tea. Application to the Detection of Teas Adulterated with Chicory

Mònica Vilà <sup>1</sup>, Àlex Bedmar <sup>1</sup>, Javier Saurina <sup>1,2</sup>, Oscar Núñez <sup>1,2,\*</sup> and Sònia Sentellas <sup>1,2,3</sup>

<sup>1</sup> Department of Chemical Engineering and Analytical Chemistry, University of Barcelona. Martí i Franquès 1-11, E08028, Barcelona, Spain; monicavr2000@hotmail.com (M.V.); alexbedmar1999@gmail.com (À.B.); xavi.saurina@ub.edu (J.S.); oscar.nunez@ub.edu (O.N.); sonia.sentellas@ub.edu (S.S.)

<sup>2</sup> Research Institute in Food Nutrition and Food Safety, University of Barcelona, Recinte Torribera, Av. Prat de la Riba 171, Edifici de Recerca (Gaudi), Santa Coloma de Gramenet, E08921 Barcelona, Spain

<sup>3</sup> Serra Hùnter Fellow, Generalitat de Catalunya, Rambla de Catalunya 19-21, E-08007 Barcelona, Spain

\* Correspondence: oscar.nunez@ub.edu

---

### FIA-ESI(-)-MS fingerprints

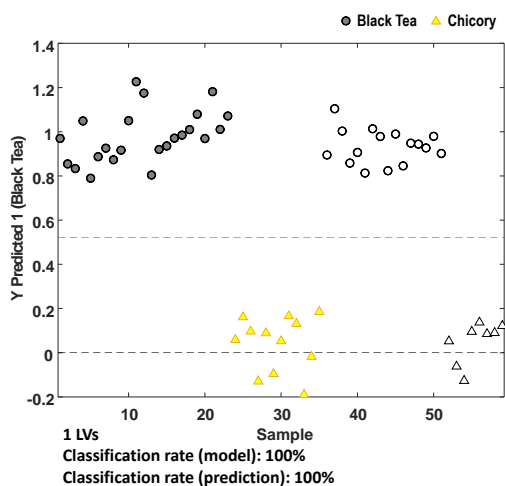

### FIA-ESI(+)-MS fingerprints

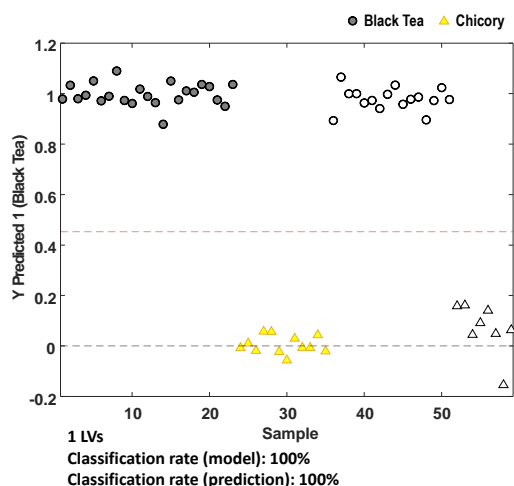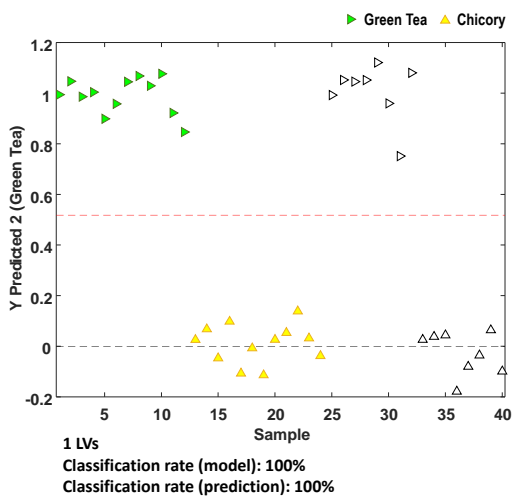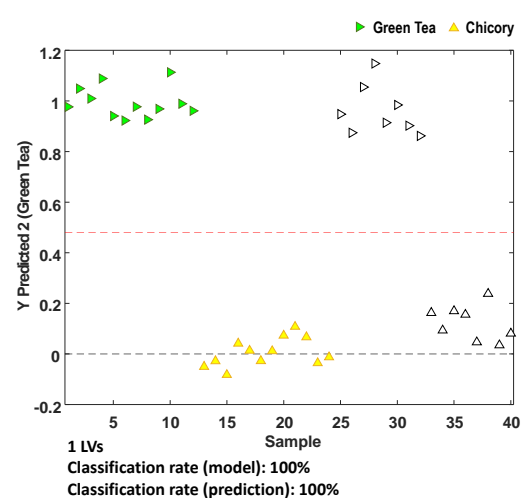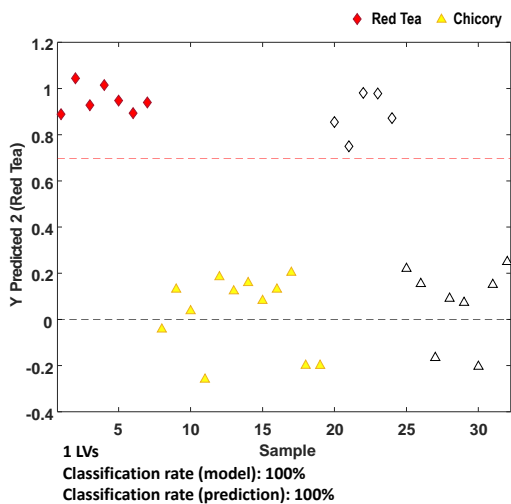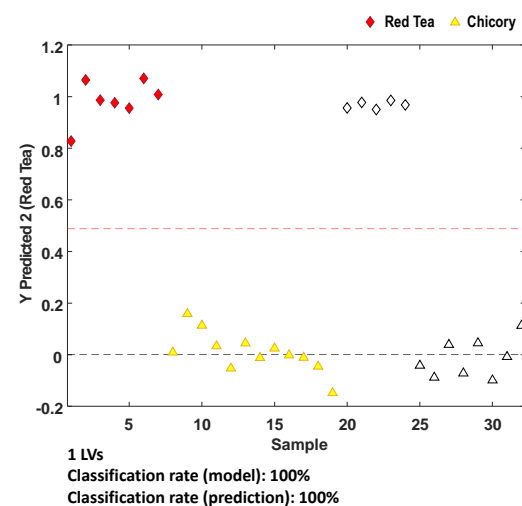

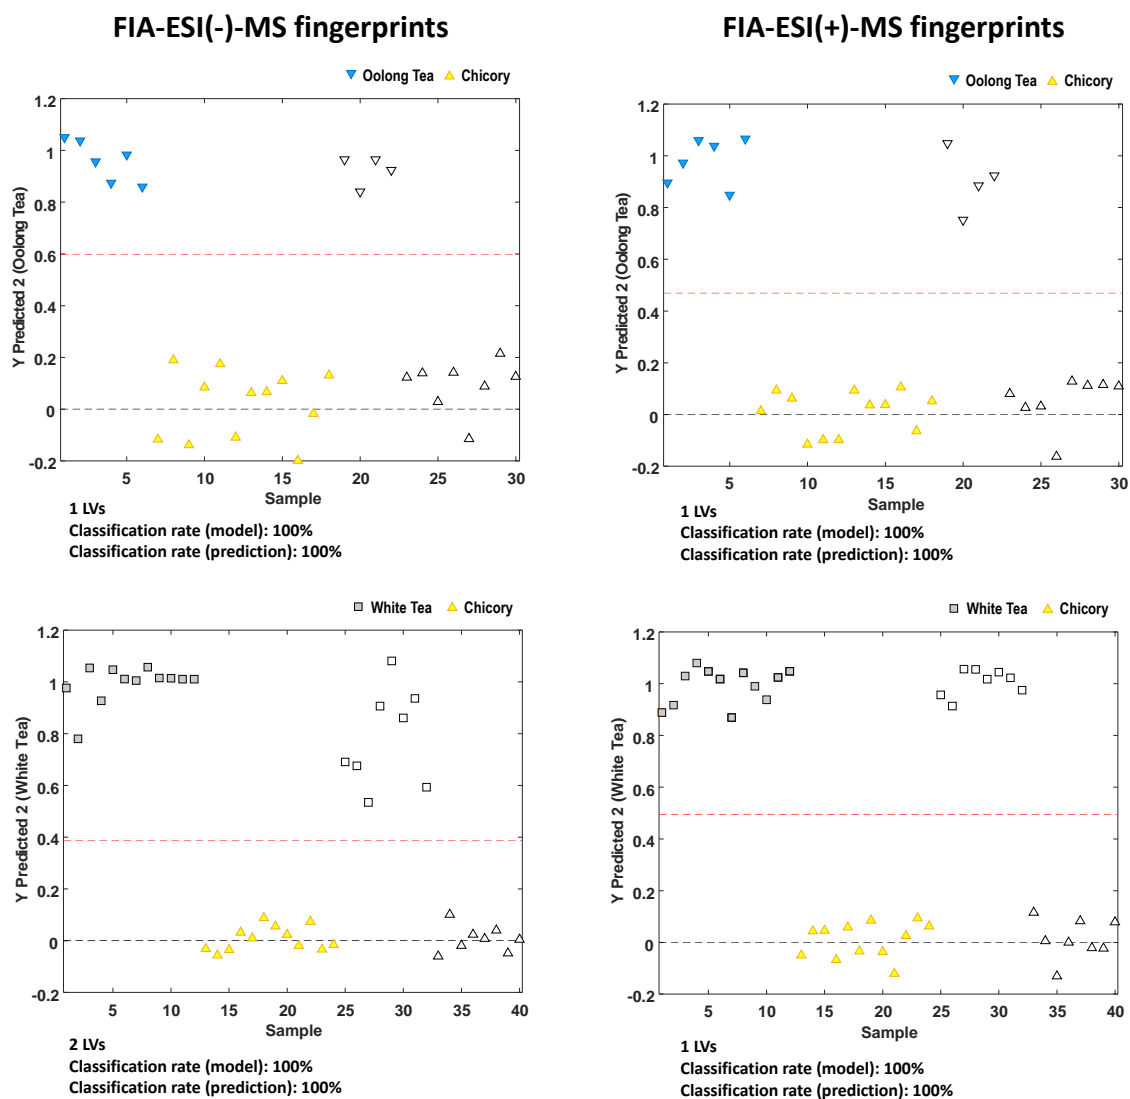

**Figure S1.** Validation of the paired PLS-DA models of each tea product variety versus chicory when using FIA-MS fingerprints from negative and positive ionization modes as the sample chemical descriptors. Red line establishes the separation threshold between both classes. Filled symbols correspond to the calibration set and empty symbols correspond to the validation set (unknown samples for prediction purposes).

### FIA-ESI(-)-MS fingerprints

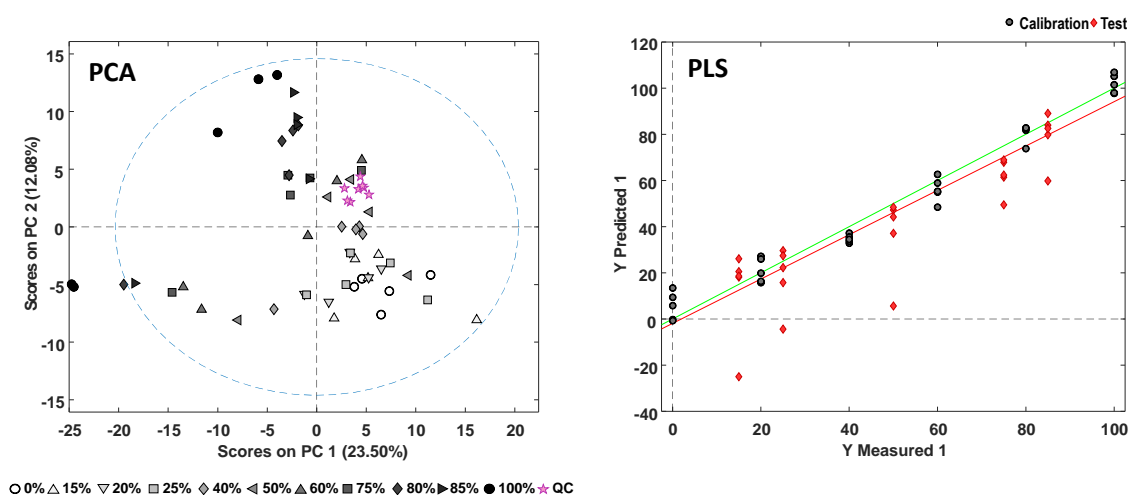

### FIA-ESI(+)-MS fingerprints

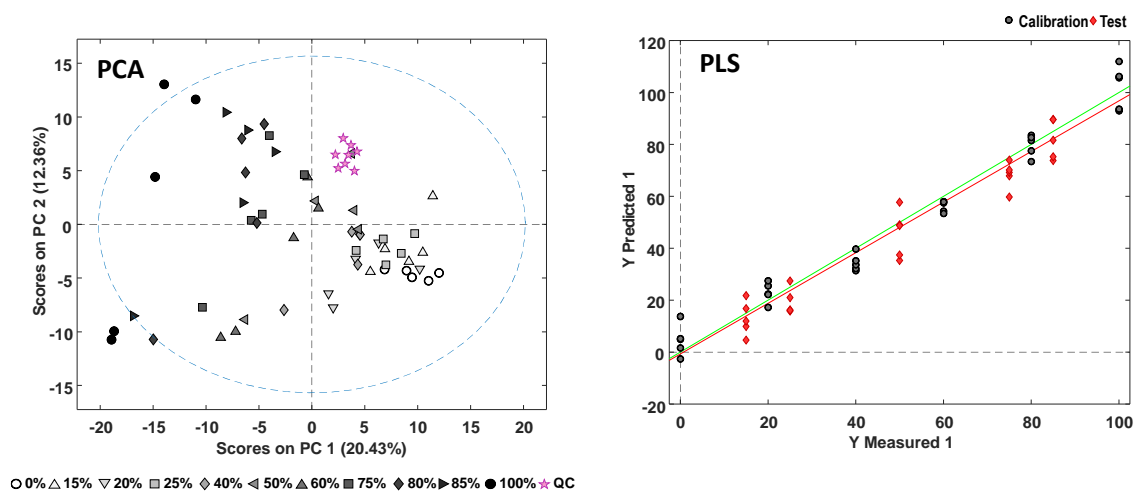

**Figure S2.** PCA score plots of PC1 versus PC2 depicting the distribution of both calibration and validation sets, and the PLS scatter plots of measured versus predicted percentages of adulterant (chicory) for the black tea adulterated with chicory case, by employing FIA-MS fingerprints in negative and positive ionization mode as sample chemical descriptors.

**Table S1.** Information about the analyzed samples.

| <b>Sample type</b> | <b>Commercial name</b>                              | <b>Production region</b> | <b>Number of samples (different lots)</b> |
|--------------------|-----------------------------------------------------|--------------------------|-------------------------------------------|
| Black tea          | Ceylon black tea                                    | Sri Lanka                | 3                                         |
|                    | Irish blend                                         | India                    | 3                                         |
|                    | Strong English breakfast                            | Sri Lanka                | 3                                         |
|                    | Yunnan finest tippy, premium                        | China                    | 3                                         |
|                    | India Assam maud                                    | India                    | 3                                         |
|                    | Kenya Marnyin                                       | Kenya                    | 3                                         |
|                    | Darjeeling ringtong (second harvest)                | India                    | 3                                         |
|                    | Darjeeling first flush (first harvest)              | India                    | 3                                         |
|                    | Formosa tarry lapsang souchong                      | Taiwan                   | 3                                         |
|                    | Ceylon quality blend                                | Sri Lanka                | 3                                         |
|                    | Ceylon Nuwara eliya                                 | Sri Lanka                | 3                                         |
|                    | Korakundah mountain tea                             | India                    | 3                                         |
|                    | Darjelling margaret's hope (first harvest, premium) | India                    | 3                                         |
| Green tea          | Organic gunpowder                                   | China                    | 2                                         |
|                    | Pi lo chun (premium)                                | Taiwan                   | 2                                         |
|                    | Sencha (Zhejiang)                                   | China                    | 2                                         |
|                    | Lung ching                                          | China                    | 2                                         |
|                    | Sencha (premium)                                    | China                    | 2                                         |
|                    | Japan Bancha premium                                | Japan                    | 2                                         |
|                    | Japan gyokuro organic                               | Japan                    | 2                                         |
|                    | Mao Feng Jiangsu                                    | China                    | 2                                         |
|                    | Assam Jamguri green                                 | India                    | 2                                         |
|                    | Lung ching second grade premium                     | China                    | 2                                         |
| Oolong tea         | Dong ding oolong                                    | Taiwan                   | 3                                         |
|                    | Tie kuan yin                                        | China                    | 3                                         |
|                    | Milky oolong                                        | China                    | 2                                         |
|                    | Special yellow sun                                  | China                    | 2                                         |
| Red tea            | Pu erh Royal (special fermentation)                 | China                    | 3                                         |
|                    | Pu erh Original                                     | China                    | 3                                         |
|                    | Pu erh Imperial (manual harvesting)                 | China                    | 3                                         |
|                    | Pu erh Royal Palace                                 | China                    | 3                                         |
| White tea          | Pai Mu tan                                          | China                    | 5                                         |
|                    | Silver needles (premium, artisanal production)      | China                    | 5                                         |
|                    | Imperial Himalayan White Tea                        | India                    | 5                                         |
|                    | Vietnam Mao Feng Organic                            | Vietnam                  | 5                                         |
| Chicory            | Chicory roots, Valley of Tea                        | Belgium                  | 5                                         |
|                    | Ecological chicory, Herbes del Molí                 | Spain                    | 5                                         |
|                    | Chicory roots, Health Embassy                       | England                  | 5                                         |
|                    | Chicory roots, Especies Pedroza                     | Spain                    | 5                                         |

**Table S2.** Blends of black tea samples adulterated with chicory according to the percentage of chicory employed. B1 to B10 refer to ten different black tea product variety samples, and C1 to C4 refer to four different chicory samples. The same procedure was applied with green tea samples.

| Adulteration level [%] | Tea | Chicory | Adulteration level [%] | Tea | Chicory |
|------------------------|-----|---------|------------------------|-----|---------|
| 0                      | B1  |         | 60                     | B1  | C2      |
|                        | B2  |         |                        | B2  | C3      |
|                        | B3  |         |                        | B3  | C4      |
|                        | B4  |         |                        | B4  | C1      |
|                        | B5  |         |                        | B5  | C2      |
| 15                     | B6  | C1      | 75                     | B6  | C3      |
|                        | B7  | C2      |                        | B7  | C4      |
|                        | B8  | C3      |                        | B8  | C1      |
|                        | B9  | C4      |                        | B9  | C2      |
|                        | B10 | C1      |                        | B10 | C3      |
| 20                     | B1  | C2      | 80                     | B1  | C4      |
|                        | B2  | C3      |                        | B2  | C1      |
|                        | B3  | C4      |                        | B3  | C2      |
|                        | B4  | C1      |                        | B4  | C3      |
|                        | B5  | C2      |                        | B5  | C4      |
| 25                     | B6  | C3      | 85                     | B6  | C1      |
|                        | B7  | C4      |                        | B7  | C2      |
|                        | B8  | C1      |                        | B8  | C3      |
|                        | B9  | C2      |                        | B9  | C4      |
|                        | B10 | C3      |                        | B10 | C1      |
| 40                     | B1  | C4      | 100                    |     | C2      |
|                        | B2  | C1      |                        |     | C3      |
|                        | B3  | C2      |                        |     | C4      |
|                        | B4  | C3      |                        |     | C1      |
|                        | B5  | C4      |                        |     | C2      |
| 50                     | B6  | C1      |                        |     |         |
|                        | B7  | C2      |                        |     |         |
|                        | B8  | C3      |                        |     |         |
|                        | B9  | C4      |                        |     |         |
|                        | B10 | C1      |                        |     |         |
